# Supplementary material
Source: ML conference proceedings conference paper supplement (https://openreview.net/forum?id=VEpU9rFaQr)
Supplement: supplementary_material [file attachment]

## A Additional related work

**Human decision making, interplay with algorithms.** Our work contributes to a vast literature on understanding how humans, and particularly human experts, make decisions. We do not attempt to provide a comprehensive summary of this work, but refer the reader to Tversky and Kahneman (1974) and Camerer and Johnson (1991) for general background. Of particular relevance for our setting is work which investigates whether humans make *systematic* mistakes in their decisions, which has been studied in the context of bail decisions (Kleinberg et al. (2017), Rambachan (2022), Lakkaraju et al. (2017) and Arnold et al. (2020)), college admissions (Kuncel et al. (2013), Dawes (1971)) and patient triage and diagnosis (Currie and MacLeod (2017), Mullainathan and Obermeyer (2019)) among others. One common theme in these works is that the decision made by the human expert will often influence the outcome of interest; for example, an emergency room doctor’s initial diagnosis will inform the treatment a patient receives, which subsequently affects their health outcomes. Furthermore, it is often the case that even observing the outcome of interest is contingent on the human’s decision: for example, in a college admissions setting, we might only observe historical outcomes for *admitted* students, which makes it challenging to draw inferences about *applicants*. This one-sided labeling problem is a form of endogeneity which has been well studied in the context of causal inference, and these works often adopt a causal perspective to address these challenges.

As discussed in Section 6, our instead work assumes that all outcomes are observable and, importantly, that they are not affected by the human predictions. We also do not explicitly grapple with whether the human expert has an objective other than maximizing accuracy under a known metric (e.g., squared error). Though this is often a primary concern in many high-stakes settings – for example, ensuring that bail decisions are not only accurate but also nondiscriminatory – it is outside the scope of our work, and we refer the reader instead to Rambachan (2022) for further discussion.

As discussed in section 1, another closely related theme is directly comparing human performance to that of an algorithm (Cowgill (2018), Dawes et al. (1989), Grove et al. (2000)), and developing learning algorithms which are complementary to human expertise (Madras et al. (2018), Raghu et al. (2019), Mozannar and Sontag (2020), Keswani et al. (2021), Agrawal et al. (2018) and Bastani et al. (2021)). A key design consideration when designing algorithms to complement human expertise involves reasoning about the ways in which humans may *respond* to the introduction of an algorithm, which may be strategic (e.g. Kleinberg and Raghavan (2018), Perdomo et al. (2020), Cen and Shah (2021), Hardt et al. (2015), Liu et al. (2020)) or subject to behavioral biases (Kleinberg et al. (2022)). These behaviors can make it challenging to design algorithms which work with humans to achieve the desired outcomes, as humans may respond to algorithmic recommendations or feedback in unpredictable ways.

**Conditional independence testing.** We cast our setting as a special case of conditional independence testing, which has been well studied in the statistics community. For background we refer the reader to Dawid (1979). It has long been known that testing conditional independence between three (possibly high-dimensional) random variables is a challenging problem, and the recent result of Shah and Peters (2018) demonstrates that this is in fact impossible in full generality. Nonetheless, there are many methods for testing conditional independence under natural assumptions; perhaps the most popular are the kernel-based methods introduced by Fukumizu et al. (2004) and subsequently developed in Gretton et al. (2007) and Zhang et al. (2011), among others.

Our work instead takes inspiration from the ‘knockoffs’ framework developed in Candès et al. (2016), Barber et al. (2018) and Barber and Candès (2019), as well as the closely related conditional permutation test of Berrett et al. (2018). These works leverage the elementary observation that, under the null hypothesis that (specialized to our notation) the outcome  $Y$  and prediction  $\hat{Y}$  are independent conditional on the observed data  $X$ , new samples from the distribution of  $\hat{Y} \mid X$  should be exchangeable with  $\hat{Y}$ . Thus, if we know – or can accurately estimate – the distribution of  $\hat{Y} \mid X$ , it is straightforward to generate fresh samples (‘knockoffs’) which are statistically indistinguishable from the original data under the null hypothesis  $H_0 : Y \perp\!\!\!\perp \hat{Y} \mid X$ . Thus, if the observed data appears anomalous with respect to these knockoffs, this may provide us a basis on which to reject  $H_0$ .

Our work avoids takes inspiration from this framework, but avoids estimating the distribution of  $\hat{Y} \mid X$  by instead leveraging a simple nearest-neighbors style algorithm for generating knockoffs. In that sense, our technique builds upon the nearest-neighbors based estimator of Runge (2017), and is

561 nearly identical to the one-nearest-neighbor procedure proposed in the ‘model-powered’ conditional  
 562 independence test of Sen et al. (2017). This algorithm is a subroutine in their more complicated  
 563 end-to-end procedure, which involves training a model to distinguish between the observed data  
 564 and knockoffs generated via swapping the ‘predictions’ (again specializing their general test to our  
 565 setting) associated with instances which are as close as possible under the  $\ell_2$  norm. By contrast,  
 566 we analyze a similar procedure under different smoothness assumptions which allow us to recover  
 567 p-values that are entirely model free.

## 568 B Proof of Theorem 1

569 We establish the proof of Theorem 1 following the intuition presented in Section 3. Specifically, we  
 570 first bound the type I error of **ExpertTest** in the idealized case where the data set contains  $L$  identical  
 571 pairs of observations  $x = x'$ . We then refine this bound to handle the case, which is more likely in  
 572 practice, that the pairs chosen are merely close together. Our final bound thus includes additional  
 573 approximation error to account for the ‘similarity’ of the pairs – if we succeed in finding  $L$  pairs  
 574 which are identical, we get nearly exact type I error control, whereas if we are forced to pair instances  
 575 which are ‘far apart’, we incur additional approximation error. We formalize this intuition below.

576 **An idealized bound.** We first establish that  $\mathbb{P}(\tau_K \leq \alpha) \leq \alpha + \frac{1}{K+1}$  for any  $\alpha \in [0, 1]$  when  $x = x'$   
 577 for every  $(x, x')$  pair chosen by **ExpertTest**.

578 To that end, we observe  $n$  data points  $(x_i, y_i, \hat{y}_i)$ ,  $i \in [n]$ . Let  $\mathcal{L} = \{i_{2\ell-1}, i_{2\ell} : \ell \in [L]\}$  denote  
 579 the indices of the pairs chosen by **ExpertTest**, with  $(x_{i_{2\ell-1}}, x_{i_{2\ell}})$  for  $\ell \in [L]$  denoting the pairs  
 580 themselves.

581 By assumption, **ExpertTest** succeeds in finding identical pairs:

$$x_{i_{2\ell-1}} = x_{i_{2\ell}}, \forall \ell \in [L]. \quad (14)$$

582 Therefore, from the definition (9) it follows that  $r((x_{i_{2\ell-1}}, \hat{y}_{i_{2\ell-1}}), (x_{i_{2\ell}}, \hat{y}_{i_{2\ell}})) = 1$  for all  $\ell \in [L]$ .

583 As discussed in Section 3, **ExpertTest** will repeatedly generate  $n$  fresh data points, denoted by  $\tilde{D}$ , as  
 584 follows. For each index  $i \in [n] \setminus \mathcal{L}$ , i.e. those not corresponding to those selected in  $L$  pairs, we select  
 585 exactly the observed data  $(x_i, y_i, \hat{y}_i)$ .

586 For  $i \in \mathcal{L}$ , we sample a data triplet as follows: for  $i \in \{i_{2\ell-1}, i_{2\ell}\}$ , we let  
 587  $(x_{i_{2\ell-1}}, y_{i_{2\ell-1}}), (x_{i_{2\ell}}, y_{i_{2\ell}})$  be the observed values but sample the corresponding  $\hat{y}$  values from  
 588  $\{(\hat{y}_{2\ell-1}, \hat{y}_{2\ell}), (\hat{y}_{2\ell}, \hat{y}_{2\ell-1})\}$  with equal probability. That is, we *swap* the  $\hat{y}$  values associated with  
 589  $(x_{i_{2\ell-1}}, y_{i_{2\ell-1}}), (x_{i_{2\ell}}, y_{i_{2\ell}})$  with probability  $\frac{1}{2}$ . We argue that this resampling process is implicitly  
 590 generating a fresh, identically distributed dataset from the underlying distribution  $\mathcal{D}$  conditioned on  
 591 the following event  $\mathcal{F}$ :

$$\mathcal{F} = \{(x_i, y_i, \hat{y}_i) : i \in [n] \setminus \mathcal{L}\} \cup \{(x_i, y_i) : i \in \mathcal{L}\} \cup \{(\hat{y}_{i_{2\ell-1}}, \hat{y}_{i_{2\ell}}) \vee (\hat{y}_{i_{2\ell}}, \hat{y}_{i_{2\ell-1}}) : \ell \in [L]\}. \quad (15)$$

592 Why condition on  $\mathcal{F}$ ? As discussed in section 3, a straightforward test would involve simply  
 593 resampling  $K$  fresh datasets from the underlying distribution  $\mathcal{D}_X \times \mathcal{D}_{\hat{Y}|X} \times \mathcal{D}_{Y|X}$  and observing  
 594 that, by definition, these datasets are distributed identically to the observed data  $D_0$  under  $H_0 : Y \perp\!\!\!\perp$   
 595  $\hat{Y} \mid X$ . While this would form the basis for a valid test along the lines of the one described in Section  
 596 3, it requires knowledge of the underlying distribution which we are unlikely to have in practice.  
 597 Thus, we instead condition on nearly everything in the observed data – the values and exact ordering  
 598 of  $X$  and the values and exact ordering of  $Y$ , and the values of  $\hat{Y}$  up to a specific set of allowed  
 599 permutations (those induced by swapping 0 or more paired  $\hat{y}_{i_{2\ell-1}}, \hat{y}_{i_{2\ell}}$  values). This substantially  
 600 simplifies the resampling problem, as we only need to reason about the correct ‘swap’ probability  
 601 for each such pair. This can be viewed as an alternative factorization of the underlying distribution  
 602  $\mathcal{D}$  under  $H_0$  – rather than sampling  $X \sim \mathcal{D}_X, Y \sim \mathcal{D}_{Y|X}, \hat{Y} \sim \mathcal{D}_{\hat{Y}|X}$ , instead sample an event  
 603  $\mathcal{F} \sim \mathcal{D}_{\mathcal{F}}$  from the induced distribution over events of the form (15), and then sample  $\hat{Y} \sim \mathcal{D}_{\hat{Y}|\mathcal{F}}$ .

604 First, we show that conditional on  $\mathcal{F}$ , the resampled dataset  $\tilde{D}$  and the observed dataset  $D_0$  are indeed  
 605 identically distributed under  $H_0 : Y \perp\!\!\!\perp \hat{Y} \mid X$  (that they are also independent, conditional on  $\mathcal{F}$ , is

clear by construction). To see this, observe that for each  $\ell \in [L]$ :

$$\mathbb{P}((x_{i_{2\ell-1}}, y_{i_{2\ell-1}}, \hat{y}_{i_{2\ell-1}}), (x_{i_{2\ell}}, y_{i_{2\ell}}, \hat{y}_{i_{2\ell}})) \quad (16)$$

$$= \mathbb{P}(x_{i_{2\ell-1}}) \mathbb{P}(y_{i_{2\ell-1}} | x_{i_{2\ell-1}}) \mathbb{P}(\hat{y}_{i_{2\ell-1}} | x_{i_{2\ell-1}}) \mathbb{P}(x_{i_{2\ell}}) \mathbb{P}(y_{i_{2\ell}} | x_{i_{2\ell}}) \mathbb{P}(\hat{y}_{i_{2\ell}} | x_{i_{2\ell}}) \quad (17)$$

$$= \mathbb{P}(x_{i_{2\ell-1}}) \mathbb{P}(y_{i_{2\ell-1}} | x_{i_{2\ell-1}}) \mathbb{P}(\hat{y}_{i_{2\ell}} | x_{i_{2\ell-1}}) \mathbb{P}(x_{i_{2\ell}}) \mathbb{P}(y_{i_{2\ell}} | x_{i_{2\ell}}) \mathbb{P}(\hat{y}_{i_{2\ell-1}} | x_{i_{2\ell}}) \quad (18)$$

$$= \mathbb{P}((x_{i_{2\ell-1}}, y_{i_{2\ell-1}}, \hat{y}_{i_{2\ell}}), (x_{i_{2\ell}}, y_{i_{2\ell}}, \hat{y}_{i_{2\ell-1}})) \quad (19)$$

In above, (17) follows from  $H_0$  and the assumption that the data are drawn i.i.d., and (18) follows from assumption (14) that  $x_{i_{2\ell-1}} = x_{i_{2\ell}}$ . By construction, the events in (16) and (19) are the only two possible outcomes after conditioning on  $\mathcal{F}$ , and this simple argument shows that in fact they are equally likely.

Thus, let  $\tilde{D}_1, \dots, \tilde{D}_K$  be  $K$  independent and identically distributed datasets generated by the above procedure. Let  $\tilde{D}_0$  be one additional sample from this distribution, which we showed was distributed identically to  $D_0$  under the idealized assumption (14).

As discussed in Section 3, for any real-valued function  $F$  that maps each dataset to  $\mathbb{R}$ , we have

$$\tau_K = \frac{1}{K} \sum_{k=1}^K \mathbb{1}[F(\tilde{D}_0) \lesssim F(\tilde{D}_k)] \quad (20)$$

where we use definition of  $\mathbb{1}[\cdot \lesssim \cdot]$  as in (7).

Because  $\tilde{D}_0, \dots, \tilde{D}_K$  are i.i.d., and thus exchangeable, it follows that  $\frac{1}{K} \sum_{k=1}^K \mathbb{1}[F(\tilde{D}_0) \lesssim F(\tilde{D}_k)]$  is uniformly distributed  $\{0, \frac{1}{K}, \dots, 1\}$ . Therefore, with a little algebra it can be verified that for any  $\alpha \in [0, 1]$ ,  $\tau_K$  satisfies

$$\mathbb{P}_{\tilde{D}_0, \dots, \tilde{D}_K | \mathcal{F}}(\tau_K \leq \alpha) \leq \alpha + \frac{1}{K+1}. \quad (21)$$

Because  $D_0$  and  $\tilde{D}_0$  are independent and identically distributed under (14), the same holds if we replace  $\tilde{D}_0$  with  $D_0$ . Thus, **ExpertTest** provides nearly exact type I error control in the case that the idealized assumption (14) holds. This result will serve as a useful building block, as we'll now proceed to relax this assumption and bound the type I error of **ExpertTest** in terms of the total variation distance between  $\tilde{D}_0$  and  $D_0$ .

**Fixing the approximation.**  $\tilde{D}_1, \dots, \tilde{D}_K$  are synthetically generated datasets that are independent and identically distributed. The argument above replaced the observed dataset  $D_0$  with a resampled ‘idealized’ dataset  $\tilde{D}_0$ , which is also independent and identically distributed with respect to  $\tilde{D}_1, \dots, \tilde{D}_K$ , and then used this fact to demonstrate that  $\mathbb{P}_{\tilde{D}_0, \dots, \tilde{D}_K | \mathcal{F}}(\tau \leq \alpha) \leq \alpha + \frac{1}{K+1}$ . If the idealized assumption (14) holds, replacing  $D_0$  with  $\tilde{D}_0$  is immaterial as we showed the two are identically distributed conditional on  $\mathcal{F}$ . Of course, this assumption will not hold in general, and this is what we seek to correct next.

Let  $\tilde{D}_0 \sim \mathcal{D}_{|\mathcal{F}}$  be a random variable distributed according to the true underlying distribution  $\mathcal{D}$ , conditional on the event  $\mathcal{F}$ . The observed data  $D_0$  can be interpreted as one realization of this random variable. One way to quantify the excess type I error incurred by using  $\tilde{D}_0$  in place of  $D_0$  is to bound the total variation distance between the joint distributions of  $(\tilde{D}_0, \dots, \tilde{D}_K)$  and that of  $(\tilde{D}_0, \tilde{D}_1, \dots, \tilde{D}_K)$ . Specifically, it follows from the definition of total variation distance that:

$$\mathbb{P}_{\tilde{D}_0, \dots, \tilde{D}_K | \mathcal{F}}(\tau_K \leq \alpha) \leq \mathbb{P}_{\tilde{D}_0, \dots, \tilde{D}_K | \mathcal{F}}(\tau_K \leq \alpha) + \text{TV}(\mathbb{P}_{\tilde{D}_0, \dots, \tilde{D}_K | \mathcal{F}}, \mathbb{P}_{\tilde{D}_0, \dots, \tilde{D}_K | \mathcal{F}}), \quad (22)$$

where  $\text{TV}(\mathbb{P}_{\tilde{D}_0, \dots, \tilde{D}_K | \mathcal{F}}, \mathbb{P}_{\tilde{D}_0, \dots, \tilde{D}_K | \mathcal{F}})$  denotes the total variation distance between its arguments. Due to the independence of the resampled datasets, this simplifies to:

$$\text{TV}(\mathbb{P}_{\tilde{D}_0, \dots, \tilde{D}_K | \mathcal{F}}, \mathbb{P}_{\tilde{D}_0, \dots, \tilde{D}_K | \mathcal{F}}) = \text{TV}(\mathbb{P}_{\tilde{D}_0 | \mathcal{F}}, \mathbb{P}_{\tilde{D}_0 | \mathcal{F}}). \quad (23)$$

Therefore, we need only bound the total variation distance between  $\mathbb{P}_{\bar{D}_0|\mathcal{F}}$  and  $\mathbb{P}_{\tilde{D}_0|\mathcal{F}}$  to conclude the proof.<sup>6</sup>

As defined in (11), the  $\varepsilon_{n,L}^*$  provides us with a way of bounding the total variation distance between the distribution of  $\bar{D}_0$  and  $\tilde{D}_0$ . To see this, observe that the distributions of  $\tilde{D}_0$  and  $\bar{D}_0$ , conditioned on  $\mathcal{F}$ , can be described as follows. To construct  $\tilde{D}_0$ , we can imagine flipping  $L$  fair coins to decide the assignment of  $\hat{y}_i$  in each of the  $(\hat{y}_{i_{2\ell-2}}, \hat{y}_{i_{2\ell}})$  pairs; if it comes up heads, we swap the observed pair  $(\hat{y}_{i_{2\ell-2}}, \hat{y}_{i_{2\ell}})$  and if it comes up tails we do not. The observed  $(x_i, y_i)$  as well as  $\hat{y}_i$  for  $i \notin \mathcal{L}$  are set in  $\tilde{D}_0$  as they are observed in  $D_0$ .

$\bar{D}_0$  is constructed similarly, but we instead flip a coin with bias  $(1 + r((x_{i_{2\ell-1}}, \hat{y}_{i_{2\ell-1}}), (x_{i_{2\ell}}, \hat{y}_{i_{2\ell}})))^{-1}$  to decide the assignment of  $(\hat{y}_{i_{2\ell-2}}, \hat{y}_{i_{2\ell}})$  – again, heads indicates that we swap the observed ordering, and tails indicates that we do not.

By construction, the distributions of  $\bar{D}_0$  and  $D_0$  are identical conditioned on  $\mathcal{F}$ , as  $r((x_{i_{2\ell-1}}, \hat{y}_{i_{2\ell-1}}), (x_{i_{2\ell}}, \hat{y}_{i_{2\ell}}))$  denotes the true relative odds of observing each of the two possible  $(x, \hat{y})$  pairings. In contrast, the distribution of  $\tilde{D}_0$  is different, as it was sampled using the simplifying assumption (14) – in particular,  $\tilde{D}_0$  is generated assuming  $r((x_{i_{2\ell-1}}, \hat{y}_{i_{2\ell-1}}), (x_{i_{2\ell}}, \hat{y}_{i_{2\ell}})) = 1$ !

The difference between the biases of these coins is bounded above by  $\varepsilon_{n,L}^*$ . We’ll use this observation, along with the following lemma, to complete the proof.

**Lemma 3 (Bounding the total variation distance between i.i.d. coin flips)** *Let  $i \in [L]$  index a sequence of i.i.d. coin flips  $u_1 \dots u_L$  each with bias  $p_i$ , and  $v_1 \dots v_L$  be a sequence of i.i.d. coin flips with bias  $q_i$ . Then we can show:*

$$\text{TV}((u_1 \dots u_L), (v_1 \dots v_L)) \leq 1 - (1 - \max_i |p_i - q_i|)^L \quad (24)$$

We defer the proof of lemma 3 to Appendix D. This implies that the total variation distance between  $\bar{D}_0$  and  $\tilde{D}_0$  is bounded above by  $1 - (1 - \varepsilon_{n,L}^*)^L$ . This, along with (21), (22) and (23) concludes the proof of Theorem 1.

### Corollary 3.1 (Weaker type I error bound)

$$\mathbb{P}(\tau \leq \alpha) \leq \alpha + \varepsilon_{n,L}^* L + \frac{1}{K+1} \quad (25)$$

Corollary 3.1 is a weaker bound than the one given in Theorem 1, but is easier to interpret and manipulate. We will make use of this fact in the following section; the proof is an immediate consequence of theorem 1 and provided in Appendix D for completeness.

## C Proof of Theorem 2

To establish theorem 2, we will argue that  $\varepsilon_{n,L}^*$  goes to 0 at a rate of  $O(n^{-\frac{1}{d}})$ . This implies that, provided  $L = o(n^{\frac{1}{d}})$ , the excess type I error established in theorem 1 is  $o(1)$  as desired. To do this, we first show that each pair  $(x_{i_{2\ell-1}}, x_{i_{2\ell}})$  chosen by **ExpertTest** will be close under the  $\ell_2$  norm (lemmas 4 and 5 below). We then leverage the smoothness assumption (12) to demonstrate that this further implies that  $\varepsilon_{n,L}^*$  concentrates around 0. For clarity we state auxiliary lemmas inline, and defer proofs to Appendix D.

### Finding pairs which are close under the $\ell_2$ norm.

Let  $M_L$  to be the set of matchings of size  $L$  on  $x_1 \dots x_n$ ; i.e. each element of  $M_L$  is a set of  $L$  disjoint  $(x, x')$  pairs. Let  $m_L^*$  be the ‘optimal’ matching satisfying:

$$m_L^* \in \arg \min_{z \in M_L} \max_{(x, x') \in z} \|x - x'\|_2. \quad (26)$$

<sup>6</sup>This technique is inspired by the proof of type I error control given for the Conditional Permutation Test in Berrett et al. (2018); see Appendix A.2 of their work for details

674 That is,  $m_L^*$  minimizes the maximum distance between any pair of observations in a mutually disjoint  
675 pairing of  $2L$  observations. Let

$$d_L^* = \max_{(x, x') \in m_L^*} \|x - x'\|_2. \quad (27)$$

676 That is, the smallest achievable maximum  $\ell_2$  distance over all matchings of size  $L$ . We'll first show  
677 that:

678 **Lemma 4 (Existence of an optimal matching)** *If  $\mathcal{X} = [0, 1]^d$  for some  $d \geq 1$ ,*

$$d_{\frac{n}{4}}^* = O\left(n^{-\frac{1}{d}}\right) \quad (28)$$

679 *with probability 1.*

680 That is, there exists a matching of size at least  $\frac{n}{4}$  such the maximum pairwise distance in this  
681 matching scales like  $O(n^{-\frac{1}{d}})$ . Lemma 4 demonstrates the existence of a sizable matching in which  
682 the maximum pairwise distance indeed tends to 0.<sup>7</sup> We next demonstrate that this approximates the  
683 optimal matching, at the cost of a factor of 2 on  $L$ .

**Lemma 5 (Greedy approximation to the optimal matching)**

$$\max_{l \in [L]} \|x_{2l-1} - x_{2l}\|_2 \leq d_{2L}^* \quad (29)$$

684 That is, the maximum distance between any of the  $L$  pairs of observations chosen by our algorithm  
685 will be no more than the maximum such distance in the optimal matching of size  $2L$ .

686 **Corollary 5.1** *For  $L \leq \frac{n}{8}$ , we have:*

$$\max_{l \in [L]} \|x_{2l-1} - x_{2l}\|_2 = O\left(n^{-\frac{1}{d}}\right) \quad (30)$$

687 This follows immediately by invoking lemma 4 to bound the right hand side of lemma 5. Corollary  
688 5.1 demonstrates that as  $n$  grows large, the maximum pairwise  $\ell_2$  distance between  $L$  greedily chosen  
689 pairs will go to zero at a rate of  $O\left(n^{-\frac{1}{d}}\right)$  provided  $L \leq \frac{n}{8}$ . We now show that the smoothness  
690 condition (12) further implies that, under these same conditions, we recover the asymptotic validity  
691 guarantee (13).

692 **From approximately optimal pairings to asymptotic validity.**

693 With the previous lemmas in place, the proof of theorem 2 is straightforward. Plugging the smoothness  
694 condition (12) into the definition of the odds ratio (9) yields the following:

695 For all  $(x_{2\ell-1}, y_{2\ell-1}), (x_{2\ell}, y_{2\ell})$ ,

$$r((x_{2\ell-1}, y_{2\ell-1}), (x_{2\ell}, y_{2\ell})) \in \left[ \frac{1}{(1 + C\|x_{2\ell-1} - x_{2\ell}\|_2)^2}, (1 + C\|x_{2\ell-1} - x_{2\ell}\|_2)^2 \right] \quad (31)$$

696 Where  $C > 0$  is the same constant in the definition of the smoothness condition (12). Corollary 5.1  
697 shows that  $\|x_{2\ell-1} - x_{2\ell}\|_2 = O\left(n^{-\frac{1}{d}}\right)$ , so (31) immediately implies that  $\varepsilon_{n,L}^*$ , defined in (11), also  
698 goes to zero at a rate of  $O\left(n^{-\frac{1}{d}}\right)$ . Thus, if we take  $L$  to be a constant and  $K \rightarrow \infty$ , the type I error  
699 given in (10) can be rewritten as

$$\mathbb{P}(\tau_K \leq \alpha) \leq \alpha + (1 - (1 - \varepsilon_{n,L}^*)^L) + \frac{1}{K+1} \quad (32)$$

$$\leq \alpha + \varepsilon_{n,L}^* L + \frac{1}{K+1} \quad (33)$$

$$= \alpha + O\left(n^{-\frac{1}{d}}\right) \quad (34)$$

---

<sup>7</sup>In principle, we could find this optimal matching by binary searching for  $d_L^*$  using the non-bipartite maximal matching algorithm of Edmonds (1965); for simplicity, our implementation uses a greedy matching strategy instead.

Where (33) follows from corollary 3.1. If we instead allow  $L$  to scale like  $o(n^{\frac{1}{d}})$  (still taking  $K \rightarrow \infty$ ), (33) implies:

$$\mathbb{P}(\tau_K \leq \alpha) \leq \alpha + o(1) \quad (35)$$

which concludes the proof of theorem 2.

## D Proofs of auxiliary lemmas

### Proof of Lemma 3.

Recall that one definition of the total variation distance between two distributions  $P$  and  $Q$  is to consider the set of *couplings* on these distributions. In particular, the total variation distance can be equivalently defined as:

$$\text{TV}(P, Q) = \inf_{(X, Y) \sim C(P, Q)} \mathbb{P}(X \neq Y) \quad (36)$$

Where  $C(\cdot, \cdot)$  is the set of couplings on its arguments. Consider then the following straightforward coupling on  $X := (u_1 \dots u_L)$  and  $Y := (v_1 \dots v_L)$ : draw  $L$  random numbers independently and uniformly from the interval  $[0, 1]$ . Denote these by  $c_1 \dots c_L$ . Let  $u_i = \mathbb{1}[c_i \leq p_i]$ , and  $v_i = \mathbb{1}[c_i \leq q_i]$ . It's clear that  $X$  and  $Y$  are marginally distributed according to  $p_1 \dots p_L$  and  $q_1 \dots q_L$ , respectively. Furthermore, the probability that  $u_i \neq v_i$  is  $|p_i - q_i|$  by construction. Thus we have:

$$\mathbb{P}(X \neq Y) = 1 - \mathbb{P}(X = Y) = 1 - \prod_{i \in [L]} (1 - |p_i - q_i|) \leq 1 - (1 - \max_i |p_i - q_i|)^L \quad (37)$$

This concludes the proof.

### Proof of Corollary 3.1.

In the preceding proof of lemma 3, observe that we could have instead written:

$$\mathbb{P}(X \neq Y) = \bigcup_{i \in [L]} \{v_i \neq u_i\} \stackrel{\text{union bound}}{\leq} \sum_{i \in [L]} |p_i - q_i| \leq L \max_{i \in [L]} |p_i - q_i| \quad (38)$$

Specializing this result to the definitions  $\bar{D}_0$  and  $\tilde{D}_0$  (and, in particular, the definition of  $\varepsilon_{n,L}^*$ ) completes the proof.

### Proof of Lemma 4.

Our proof will proceed via a covering argument. In particular, we cover the feature space  $[0, 1]^d$  with a set of non-overlapping  $d$ -dimensional hypercubes, each of which has edge length  $0 < b < 1$ , and show that sufficiently many pairs  $(x, x')$  must lie in the same ‘small’ hypercube. To that end, let  $C = \{c_1 \dots c_k\}$  be a set of hypercubes of edge length  $b$  with the following properties:

$$\forall c \in C, c \subseteq [-b, 1 + b]^d \quad (39)$$

$$\forall c, c' \in C, c \cap c' = \emptyset \quad (40)$$

$$\forall x \in D_0, \exists c \in C \mid x \in c \quad (41)$$

Where  $D_0$  is the observed data. It's clear that such a covering  $C$  must exist, for example by arranging  $c_1 \dots c_k$  in a regularly spaced grid which cover  $[0, 1]^d$  (though note that per condition (39), some of these ‘small’ hypercubes may extend outside  $[0, 1]^d$  if  $b$  does not evenly divide 1). Such a covering may be difficult to index as care must be exercised around the boundaries of each small hypercube; however, as we only require the existence of such a covering, we ignore these details. We now state the following elementary facts:

$$|C| \leq \left\lfloor \frac{(1 + 2b)^d}{b^d} \right\rfloor \quad (42)$$

$$\forall c \in C, x, x' \in c, \|x - x'\|_2 \leq b\sqrt{d} \quad (43)$$

Where (42) follows because the volume of each  $c \in C$  is  $b^d$ , and the total volume of all such hypercubes cannot exceed the volume of the containing hypercube  $[-b, 1+b]^d$ , which gives us an upper bound on the size of the cover  $C$ . Furthermore, (43) tells us that for any  $(x, x')$  which lie in the same ‘small’ hypercube  $c$ , we have  $\|x - x'\|_2 \leq b\sqrt{d}$ .

Let  $n_c := |\{x_i \mid x_i \in c\}|$  denote the number of observations contained in each small hypercube  $c \in C$ .

**Corollary 5.2** *For any  $c \in C$ , there exist at least  $\lfloor \frac{n_c}{2} \rfloor$  disjoint pairs  $(x, x') \in c$  such that  $\|x - x'\|_2 \leq b\sqrt{d}$ .*

With these preliminaries in place, we’ll proceed to prove lemma 4. To do this, we’ll first state one additional auxiliary lemma.

Let  $N_{a,b} := \frac{a^d}{b^d} \geq \lfloor \frac{a^d}{b^d} \rfloor$ , an upper bound on the number of non-overlapping ‘small’ hypercubes with edge length  $b$  which can fit into  $[0, a]^d$ . We’ll show for any  $z > 0$ , with  $b := \frac{z}{\sqrt{d}}$ ,  $a := 1 + 2b$ , we have:

**Lemma 6 (Pairwise distance in terms of packing number)**

$$n \geq 2N_{a,b} \Rightarrow \exists \frac{n}{4} \text{ pairs satisfying } \|x - x'\|_2 \leq z \quad (44)$$

That is, the pairwise distance between the closest set of  $\frac{n}{4}$  pairs (half the observed data in total) can be written in terms of the appropriately parameterized covering number. We defer the proof of this lemma to the following section. For now, we simply plug in the definition of  $N_{a,b}$  and rearrange to recover:

$$n \geq 2N_{a,b} = 2 \frac{\left(1 + 2\frac{z}{\sqrt{d}}\right)^d}{\left(\frac{z}{\sqrt{d}}\right)^d} \Rightarrow \frac{2^{\frac{1}{d}} \sqrt{d}}{n^{\frac{1}{d}} - 2^{1+\frac{1}{d}}} \leq z \quad (45)$$

Recall that  $z$  is the maximum distance between any pairs  $(x, x')$  contained in the same small hypercube with edge length  $\frac{z}{\sqrt{d}}$ . The preceding argument holds for all  $z > 0$  which satisfy (45), so in particular, it holds for

$$z^* := \frac{2^{\frac{1}{d}} \sqrt{d}}{n^{\frac{1}{d}} - 2^{1+\frac{1}{d}}}. \quad (46)$$

$z^*$  is the maximum pairwise distance corresponding to one possible matching on  $\frac{n}{4}$   $(x, x')$  pairs, so this further implies that there exists a matching  $M$  of size  $\frac{n}{4}$  such that:

$$\max_{(x, x') \in M} \|x - x'\|_2 \leq \frac{2^{\frac{1}{d}} \sqrt{d}}{n^{\frac{1}{d}} - 2^{1+\frac{1}{d}}} = O(n^{-\frac{1}{d}})$$

With probability 1. Thus, it follows that the maximum distance between any pair in the optimal matching  $d_{\frac{n}{4}}^*$  also satisfies:

$$d_{\frac{n}{4}}^* = O\left(\frac{2^{\frac{1}{d}} \sqrt{d}}{n^{\frac{1}{d}} - 2^{1+\frac{1}{d}}}\right) = O\left(n^{-\frac{1}{d}}\right)$$

With probability 1, as desired. This establishes the existence of a matching of up to  $L = \frac{n}{4}$  disjoint pairs  $(x, x') \in [0, 1]^d$  such that the maximum distance between any such pair scales like  $O\left(n^{-\frac{1}{d}}\right)$ .

We also consider the case where instead of  $\mathcal{X} := [0, 1]^d$ , we instead have  $\mathbb{P}(X \in [0, 1]^d) \geq 1 - \delta$  for some  $\delta \in (0, 1)$ . For example, this will capture the case where  $X$  is a (appropriately re-centered and re-scaled) multivariate Gaussian. In this case, we provide a corresponding high probability version of lemma 4.

758 **Corollary 6.1** Suppose instead of  $\mathcal{X} := [0, 1]^d$ , we have for some  $\delta \in (0, 1)$ :

$$\mathbb{P}(X \in [0, 1]^d) \geq 1 - \delta \quad (47)$$

759 Define  $m := (1 - \delta)^2 n$

760 We can then show:

$$\mathbb{P}\left(d_{\frac{m}{4}}^* \leq \frac{2^{\frac{1}{d}} \sqrt{d}}{m^{\frac{1}{d}} - 2^{1+\frac{1}{d}}}\right) \geq 1 - e^{-\frac{\delta^2(1-\delta)n}{2}} \quad (48)$$

761 That is, we can still achieve a constant factor approximation to the optimal matching in Lemma 4  
762 with probability that exponentially approaches 1.

763 **Proof of Corollary 6.1**

764 Define the set of points which falls in  $[0, 1]^d$  as follows:

$$S_0 := \{X_i \mid X_i \in [0, 1]^d\} \quad (49)$$

765 and

$$n_0 := |S_0| \quad (50)$$

766 It is clear that in this setting, the proof of lemma 4 holds if we simply replace  $n$  with  $n_0$ , the  
767 realized number of observations which fall in  $[0, 1]^d$ . However,  $n_0$  is now a random quantity which  
768 follows a binomial distribution with mean  $(1 - \delta)n$  (recall that we assume  $(x_i, y_i, \hat{y}_i)$  are drawn  
769 i.i.d. throughout). Thus, all that remains is to bound  $n_0$  away from 0, which we can do via a simple  
770 Chernoff bound:

$$\mathbb{P}(n_0 \leq (1 - \delta)^2 n) \leq e^{-\frac{\delta^2(1-\delta)n}{2}} \quad (51)$$

771 Thus, it follows that

$$\mathbb{P}(n_0 \geq (1 - \delta)^2 n) \geq 1 - e^{-\frac{\delta^2(1-\delta)n}{2}} \quad (52)$$

772 Thus, we have shown  $n_0 \geq m$  with the desired probability. It is clear that we only require a lower  
773 bound on  $n_0$  to recover the result of Theorem 4, as additional observations which fall in  $[0, 1]^d$  can  
774 only improve the quality of the optimal matching  $d_{\frac{m}{4}}^*$ .

775 **Proof of Lemma 5**

776 We will show that the procedure in **ExpertTest** which greedily pairs the closest remaining pair of  
777 points  $L$  times will always be able to choose at least one of the pairs in an optimal matching of size  
778  $2L$ . Intuitively, this is because each pair  $(x, x')$  chosen by **ExpertTest** can only ‘rule out’ at most two  
779 pairs  $(x, x'')$ ,  $(x', x''')$  in any optimal matching of size  $2L$ . Thus, our greedy algorithm for choosing  
780  $L$  pairs can perform no worse than an optimal matching of size  $2L$ , the sense of minimizing the  
781 maximum pairwise distance.

782 Let  $m_{2L}^*$  be an optimal matching of size  $2L$  in the sense of (26). Then suppose towards contradiction  
783 that:

$$\max_{l \in [L]} \|x_{2l-1} - x_{2l}\|_2 > d_{2L}^* \quad (53)$$

784 Where  $d_{2L}^*$  is the smallest achievable maximum distance for any matching of size  $2L$  as in (27).

785 Finally, let  $l_m := \arg \min_{l \in [L]} \|x_{2l-1} - x_{2l}\|_2 > d_{2L}^*$ ; i.e. the first pair which is chosen by  
786 **ExpertTest** that violates (53). Because pairs are chosen greedily to minimize  $\ell_2$  distance, and  $m_{2L}^*$   
787 is a matching of size  $2L$  where all pairs are separated by at most  $d_{2L}^*$  under the  $\ell_2$  norm, it must be  
788 that *none* of the pairs which make up  $m_{2L}^*$  were available to **ExpertTest** at the  $l_m$ -th iteration. In  
789 particular, at least one element of every  $(x, x')$  pair in  $m_{2L}^*$  must have been selected on a previous  
790 iteration:

$$\forall (x, x') \in m_{2L}^*, x \in \{x_1 \dots x_{2l_m-2}\} \vee x' \in \{x_1 \dots x_{2l_m-2}\} \quad (54)$$



791 As  $m_{2L}^*$  contains  $2L$  disjoint pairs –  $4L$  observations total – this implies that  $2l_m - 2 \geq 2L \Rightarrow$   
 792  $l_m - 1 \geq L \Rightarrow l_m > L$ . This is a contradiction, as **ExpertTest** only chooses  $L$  pairs, so  $l_m$  only  
 793 ranges in  $[1, L]$ . This completes the proof.

794 **Corollary 6.2** *Validity in finite samples*

795 *Theorem 2 implies that we can achieve a bound on the excess type one error in finite samples if we*  
 796 *knew the constant  $C$  in (12). In particular, let*

$$m^* := \max_{\ell \in [L]} \|x_{2\ell-1} - x_{2\ell}\|_2 \quad (55)$$

$$\epsilon^* := \max_{r \in [(1+Cm^*)^{-2}, (1+Cm^*)^2]} \left| \frac{1}{r+1} - \frac{1}{2} \right| \quad (56)$$

797 *Then (10) implies that we can always construct a valid (if underpowered) test at exactly the nominal*  
 798 *size  $\alpha$  by updating our REJECT threshold to*

$$\alpha - (1 - (1 - \epsilon^*)^L) - \frac{1}{K+1}$$

799 **Proof of lemma 6**

800 let  $C := \{c_1 \dots c_k\}$  denote any set of  $k$  ‘small’ nonoverlapping hypercubes of edge length  $b$  satisfying  
 801 properties (39), (40) and (41). As discussed in the proof of lemma 4, each element of  $C$  is not  
 802 guaranteed to lie strictly in  $[0, 1]^d$ . Rather, each  $c \in C$  must merely intersect  $[0, 1]^d$ , implying that  
 803 each element of the cover is instead contained in the slightly larger hypercube  $[-b, 1+b]^d$ . As in the  
 804 proof of lemma 4, we’ll again let  $n_c$  denote the number of observations  $x_i$  which lie in some  $c \in C$ .

805 By Corollary 5.2, we have that  $\lfloor \frac{n_c}{2} \rfloor$  pairs in each  $c \in C$  will satisfy  $\|x - x'\|_2 \leq b\sqrt{d} = z$ . Thus  
 806 what’s left to show is that:

$$n \geq 2N_{a,b} \Rightarrow \sum_{j \in [k]} \lfloor \frac{n_{c_j}}{2} \rfloor \geq \frac{n}{4}$$

807 We can see this via the following argument:

$$\sum_{j \in [k]} \lfloor \frac{n_{c_j}}{2} \rfloor \geq \sum_{j \in [k]} \left( \frac{n_{c_j}}{2} - \frac{1}{2} \right) \quad (57)$$

$$= \frac{n}{2} - \frac{k}{2} \quad (58)$$

$$\geq \frac{n}{2} - \frac{N_{a,b}}{2} \quad (59)$$

$$\geq \frac{n}{2} - \frac{n}{4} = \frac{n}{4} \quad (60)$$

808 Where (59) follows from (42) and the definition of  $N_{a,b}$ , and (60) follows because  $n \geq 2N_{a,b}$  by  
 809 assumption. This completes the proof.

## 810 E Omitted Details from Section 5

### 811 E.1 Identifying relevant patient encounters and classifying outcomes

812 As described in Section 5, we consider a set of 3617 patients who presented with signs or symptoms  
 813 of acute gastrointestinal bleeding at the emergency department at a large quaternary academic hospital  
 814 system from January 2014 to December 2018. These patient encounters were identified using a  
 815 database mapping with a standardized ontology (SNOMED-CT) and verified by manual physician  
 816 chart review. Criteria for inclusion were the following: any text that identifies acute gastrointestinal  
 817 bleeding for hematemesis, melena, hematochezia from either patient report or physical exam findings

(which were considered equally valid for the purposes of inclusion). Exclusion criteria were the following: patients with other reasons for overt bleeding symptoms (e.g. epistaxis) or missingness in input variables required to calculate the Glasgow-Blatchford Score.

This identified a set of 3627 patients, of which a further 10 were removed from consideration due to unclear emergency department disposition (neither Admit nor Discharge). As described in Section 5, we record an adverse outcome ( $Y = 1$ ) for admitted patients who required some form of hemostatic intervention (excluding a diagnostic endoscopy or colonoscopy), or patients who are readmitted or die within 30 days. We record an outcome of 0 for all other patients.

The use of readmission as part of the adverse event definition is subject to two important caveats. First, we are only able to observe patients who are readmitted within the *same* hospital system. Thus, although the hospital system we consider is the dominant regional health care network, it is possible that some patients subsequently presented elsewhere with signs or symptoms of AGIB; such patients would be incorrectly classified as not having suffered an adverse outcome. Second, we only record an outcome of 1 for patients who are readmitted with signs or symptoms of AGIB, subject to the same inclusion criteria defined above. Patients who are readmitted for other reasons are not recorded as having suffered an adverse outcome.

## E.2 The special case of binary outcomes and predictions

In our experiments we define the loss measure  $F(D) := \frac{1}{n} \sum_i \mathbb{1}[y_i \neq \hat{y}_i]$ , but it's worth remarking that this is merely one choice within a large class of natural loss functions for which **ExpertTest** produces identical results when  $Y, \hat{Y}$  are binary. In particular, observe that a swap of  $(y_1, \hat{y}_1), (y_2, \hat{y}_2)$  can only change the value of  $F(\cdot)$  if  $y_1 \neq y_2$  and  $\hat{y}_1 \neq \hat{y}_2$  (we'll assume throughout that all observations contribute equally to the loss; i.e. it is invariant to permutations of the indices  $i \in [n]$ ). This implies that there are only  $2^2$  out of  $2^4$  possible configurations of  $(y_1, \hat{y}_1, y_2, \hat{y}_2)$  where a swap can change the loss at all. Of these, two configurations create a false negative and a false positive in the synthetic data which did not exist in the observed data:

$$\begin{array}{ccc} \underbrace{(y_1 = 1, \hat{y}_1 = 1, y_2 = 0, \hat{y}_2 = 0)}_{\text{original data}} & \xrightarrow{\text{swap}} & \underbrace{(y_1 = 1, \hat{y}_1 = 0, y_2 = 0, \hat{y}_2 = 1)}_{\text{synthetic data}} \\ (y_1 = 0, \hat{y}_1 = 0, y_2 = 1, \hat{y}_2 = 1) & \xrightarrow{\text{swap}} & (y_1 = 0, \hat{y}_1 = 1, y_2 = 1, \hat{y}_2 = 0) \end{array}$$

The other two configurations which change the loss are symmetric, in that a swap *removes* both a false negative and false positive that exists in the observed data:

$$\begin{array}{ccc} (y_1 = 0, \hat{y}_1 = 1, y_2 = 1, \hat{y}_2 = 0) & \xrightarrow{\text{swap}} & (y_1 = 0, \hat{y}_1 = 0, y_2 = 1, \hat{y}_2 = 1) \\ (y_1 = 1, \hat{y}_1 = 0, y_2 = 0, \hat{y}_2 = 1) & \xrightarrow{\text{swap}} & (y_1 = 1, \hat{y}_1 = 1, y_2 = 0, \hat{y}_2 = 0) \end{array}$$

Thus, for any natural loss function which is strictly increasing in the number of mistakes  $\sum_i \mathbb{1}[y_i \neq \hat{y}_i]$ , the first two configurations of  $(y_1, \hat{y}_1, y_2, \hat{y}_2)$  will induce swaps which strictly increase the loss, while the latter two will induce swaps that strictly decrease the loss. This means that for a given set of  $L$  pairs, we can compute the number of swaps which would increase (respectively, decrease) the loss for *any* function in this class of natural losses. In particular, this class includes loss functions which may assign arbitrarily different costs to false negatives and false positives. Thus, in the particular context of assessing physician triage decisions, our results are robust to variation in the way different physicians, patients or other stakeholders might weigh the relative cost of false negatives (failing to hospitalize patients who should have been admitted) and false positives (hospitalizing patients who could have been discharged to outpatient care).

## F Numerical Experiments

We first elaborate here on the example 1 presented in the introduction. Consider the following stylized data generating process:

858 **Example: experts can add value despite poor performance.**

859 Let  $X, U, \epsilon_1, \epsilon_2$  be independent random variables distributed as follows:

$$X \sim \mathcal{U}([-2, 2]), U \sim \mathcal{U}([-1, 1]), \epsilon_1 \sim \mathcal{N}(0, 1), \epsilon_2 \sim \mathcal{N}(0, 1)$$

860 Where  $\mathcal{U}(\cdot)$  and  $\mathcal{N}(\cdot, \cdot)$  are the uniform and normal distribution, respectively. Suppose the true data  
861 generating process for the outcome of interest  $Y$  is

$$Y = X + U + \epsilon_1$$

862 Suppose a human expert constructs a prediction  $\hat{Y}$  which is intended to forecast  $Y$  and can be  
863 modeled as:

$$\hat{Y} = \text{sign}(X) + \text{sign}(U) + \epsilon_2$$

864 Where  $\text{sign}(X) := \mathbb{1}[X > 0] - \mathbb{1}[X < 0]$ .

865 We compare this human prediction to that of an algorithm  $\hat{f}(\cdot)$  which can only observe  $X$ , and  
866 correctly estimates

$$\hat{f}(X) = \mathbb{E}[Y \mid X] = X$$

867 As described in the introduction, we use this example to demonstrate that **ExpertTest** can detect  
868 that the forecast  $\hat{Y}$  is incorporating the unobserved  $U$  even though the accuracy of  $\hat{Y}$  is substantially  
869 worse than that of  $\hat{f}(X)$ . In particular, we consider the *mean squared error* (MSE) of each of these  
870 predictors:

$$\text{Algorithm MSE} := \frac{1}{n} \sum_i (Y_i - \hat{f}(X_i))^2$$

$$\text{Human MSE} := \frac{1}{n} \sum_i (Y_i - \hat{Y}_i)^2$$

871 We'll show below that the Algorithm MSE is substantially smaller than the Human MSE. However,  
872 we may also wonder whether the performance of the human forecast  $\hat{Y}$  is somehow artificially  
873 constrained by the the relative scale of  $\hat{Y}$  and  $Y$ , as the  $\text{sign}(\cdot)$  operation restricts the range of  $\hat{Y}$ .  
874 For example, a forecaster who always outputs  $\hat{Y} = \frac{Y}{100}$  is perfectly correlated with the outcome but  
875 will incur very large squared error; this is a special case of the more general setting where human  
876 forecasts are directionally correct but poorly *calibrated*. To test this hypothesis, we can run ordinary  
877 least squares regression (OLS) of  $Y$  on  $\hat{Y}$  and compute the squared error of this rescaled prediction.  
878 It is well known OLS estimates the optimal linear rescaling with respect to squared error, and we  
879 further use the *in sample* MSE of this rescaled prediction to provide a lower bound on the achievable  
880 loss. In particular, let:

$$(\beta^*, c^*) := \min_{\beta, c \in \mathbb{R}} \|Y - \beta \hat{Y} - c\|_2^2 \quad (61)$$

$$\text{Rescaled Human MSE} := \frac{1}{n} \sum_i (Y_i - \beta^* \hat{Y}_i - c^*)^2 \quad (62)$$

881 In Table 3 we report the mean squared error (plus/minus two standard deviations) over 100 draws  
882 of  $n = 1000$  samples from the data generating process described above. As we can see, both the  
883 original and rescaled human forecasts substantially underperform  $\hat{f}(\cdot)$ .

Table 3: Expert vs Algorithm Performance

| Algorithm MSE   | Human MSE       | Rescaled Human MSE |
|-----------------|-----------------|--------------------|
| $1.33 \pm 0.12$ | $2.67 \pm 0.24$ | $1.92 \pm 0.16$    |

884 We now assess the power of **ExpertTest** in this setting by repeatedly simulating  $n = 1000$  draws  
885 of  $(X, U, \epsilon_1, \epsilon_2)$  along with the associated outcomes  $Y := X + U + \epsilon_1$  and expert predictions  
886  $\hat{Y} := \text{sign}(X) + \text{sign}(U) + \epsilon_2$ . We sample 100 datasets in this manner, and run **ExpertTest** on each  
887 one with  $L, K = 100$ , and the distance metric  $m(x, x') := \sqrt{(x - x')^2}$ . The distribution of p-values  
888  $\tau_1 \dots \tau_{100}$  is plotted in Figure 1.

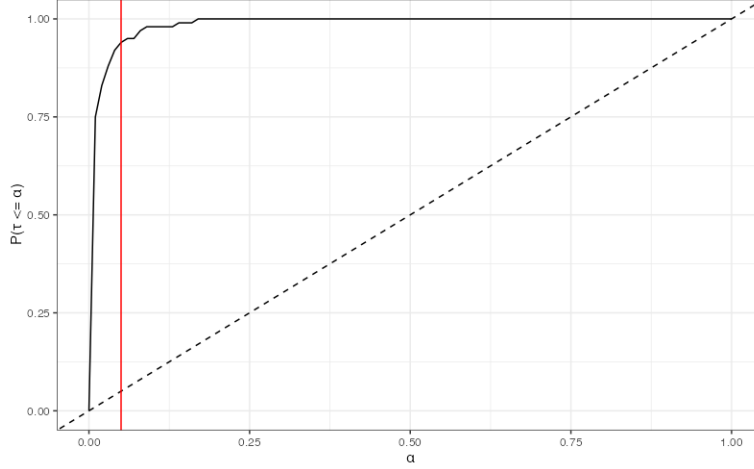

Figure 1: distribution of  $\tau$  is sharply nonuniform when the expert incorporates unobserved information  $U$  in the toy example. The vertical red line indicates a critical threshold of  $\alpha = .05$ , and the dashed line traces a uniform distribution.

889 We see that **ExpertTest** produces a highly nonuniform distribution of the p-value  $\tau$ , and rejects the  
890 null hypothesis 94% of the time at a critical value of  $\alpha = .05$ . To assess whether this power comes at  
891 the expense of an inflated type I error, we also run **ExpertTest** with both  $X$  and  $U$  ‘observed’; in  
892 particular, suppose the distance measure was instead  $m((x, u), (x', u')) = \sqrt{(x - x')^2 + (u - u')^2}$   
893 with everything else defined as above. The distribution of  $\tau$  in this setting is again plotted in Figure 2.

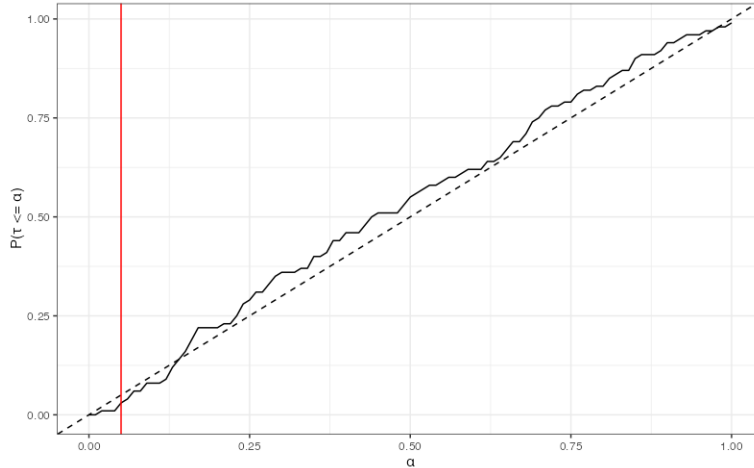

Figure 2: distribution of  $\tau$  is approximately uniform when the expert does not incorporate unobserved information in the toy example. The vertical red line indicates a critical threshold of  $\alpha = .05$ , and the dashed line traces a uniform distribution.

894 When both  $X$  and  $U$  are observed, and thus the null hypothesis should not be rejected, we instead see  
895 that we instead get an approximately uniform distribution of  $\tau$  with a false discovery rate of only .03  
896 at a critical value of  $\alpha = .05$ . Thus, the power of **ExpertTest** to detect that the synthetic expert is  
897 incorporating some unobserved information  $U$  does not come at the expense of inflated type I error,  
898 at least in this synthetic example.

We now present additional simulations to highlight how the power of **ExpertTest** scales with the number of pairs  $L$  and the sample size  $n$  in a more general setting. In particular, we consider a simple synthetic dataset  $(x_i, y_i, \hat{y}_i), i \in [n] \equiv \{1, \dots, n\}$  where  $x_1 \dots x_n = [1, 1, 2, 2, \dots, \frac{n}{2}, \frac{n}{2}]'$  and  $y_1 \dots y_n$  is the alternating binary string  $[0, 1, 0, 1, \dots, 0, 1]'$  (we consider only even  $n$  for simplicity). This guarantees that each of the  $L$  pairs chosen are such that  $(x_{2\ell-1} = x_{2\ell})$  and  $y_{2\ell-1} \neq y_{2\ell}$ . Importantly, it's also clear that  $x$  is uninformative about the true outcome  $y$  – if the expert can perform better than random guessing, it must be by incorporating some unobserved signal  $U$ .

We model this unobserved signal by an ‘expertise parameter’  $\delta \in [0, \frac{1}{2}]$ . In particular, for each pair  $(y_{2\ell-1}, y_{2\ell})$  for  $\ell \in [1 \dots \frac{n}{2}]$ , we sample  $(\hat{y}_{2\ell-1}, \hat{y}_{2\ell})$  such that  $(\hat{y}_{2\ell-1}, \hat{y}_{2\ell}) = (y_{2\ell-1}, y_{2\ell})$  with probability  $\frac{1}{2} + \delta$  and  $(y_{2\ell}, y_{2\ell-1})$  otherwise. Intuitively,  $\delta$  governs the degree to which the expert predictions  $\hat{Y}$  incorporate unobserved information – at  $\delta = 0$ , we model an expert who is randomly guessing, whereas at  $\delta = \frac{1}{2}$  the expert predicts the outcome with perfect accuracy.

First, we consider the case of  $n \in \{200, 600, 1200\}$  and fix  $L$  at  $\frac{n}{8}$  as suggested by the proof of Theorem 2. For each of these cases, we examine how the discovery rate scales with the expertise parameter  $\delta \in \{0, .05, \dots, .45, .50\}$ . In particular, we choose a critical threshold of  $\alpha = .05$  and compute how frequently **ExpertTest** rejects  $H_0$  over 100 independent draws of the data for each value of  $\delta$ . These results are plotted below in Figure 3.

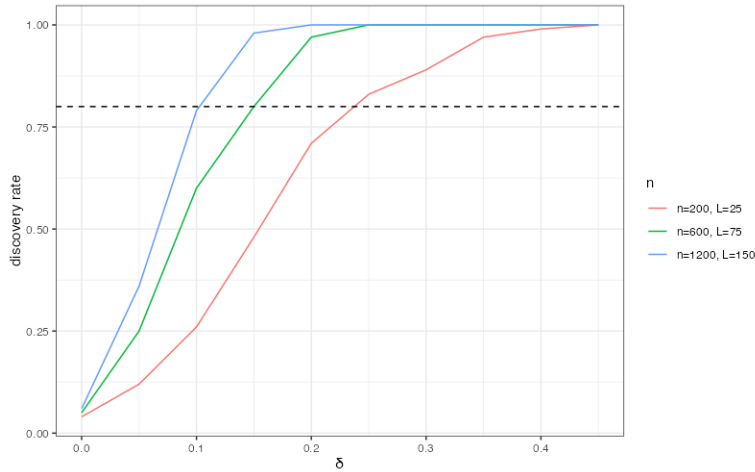

Figure 3: The power of **ExpertTest** as a function of sample size  $n$  and expertise parameter  $\delta$ . The horizontal dashed line corresponds to a power of 80%

Unsurprisingly, the power of **ExpertTest** depends critically on the sample size – at  $n = 1200$ , **ExpertTest** achieves 80% power in rejecting  $H_0$  when the expert only performs modestly better than random guessing ( $\delta \approx .1$ ). In contrast, at  $n = 200$ , **ExpertTest** fails to achieve 80% power until  $\delta \approx .25$  – corresponding to an expert who provides the correct predictions over 75% of the time even when the observed  $x$  is completely uninformative about the true outcome.

Next we examine how the power of **ExpertTest** scales with  $L$ . We now fix  $n = 600$  and let  $\delta = .2$  to model an expert who performs substantially better than random guessing, but is still far from providing perfect accuracy. We then vary  $L \in \{20, 40 \dots 200\}$  and plot the discovery rate (again at a critical value of  $\alpha = .05$ , over 500 independent draws of the data) for each choice of  $L$ . These results are presented below in Figure 4.

As expected, we see that power is monotonically increasing in  $L$ , and asymptotically approaching 1. With  $\delta = .2$ , we see that **ExpertTest** achieves power in the neighborhood of only 50% with  $L = 20$  pairs, but sharply improves to approximately 80% power once  $L$  increases to 40. Beyond this threshold we see that there are quickly diminishing returns to increasing  $L$ .

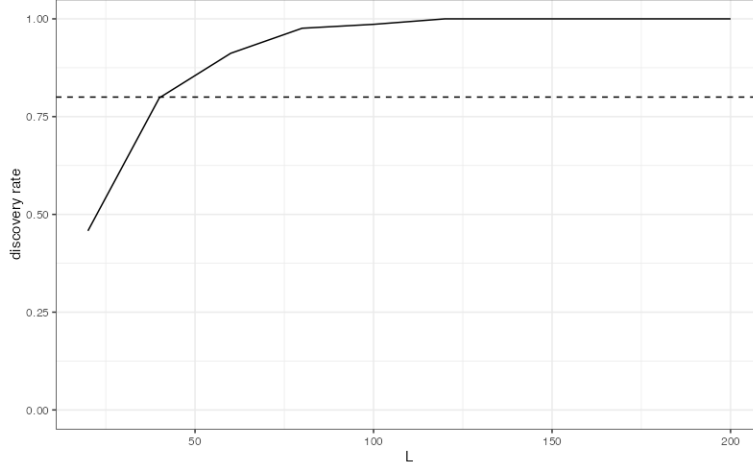

Figure 4: The power of **ExpertTest** as a function of  $L$ , with  $n = 600, \delta = .2$ . The horizontal dashed line corresponds to a power of 80%

#### 931 Excess type I error of ExpertTest

932 Recall that, per Theorem 1, **ExpertTest** becomes more likely to incorrectly reject  $H_0$  as  $L$  increases  
 933 relative to  $n$ . In particular, larger values of  $L$  will force **ExpertTest** to choose  $(x, x')$  pairs which are  
 934 farther apart under any distance metric  $m(\cdot, \cdot)$ , and thus induce larger values of  $\varepsilon_{n,L}^*$  as defined in  
 935 (11). Furthermore, even for fixed  $\varepsilon_{n,L}^* > 0$ , the type one error bound given in Theorem 1 degrades  
 936 with  $L$ . We empirically investigate this phenomenon via the following numerical simulation.

937 First, let  $X = (X_1, X_2, X_3) \subset \mathbb{R}^3$  be uniformly distributed over  $[0, 10]^3$ . Let  $Y = X_1 + X_2 + X_3 + \epsilon_1$   
 938 and  $\hat{Y} = X_1 + X_2 + X_3 + \epsilon_2$ , where  $\epsilon_1, \epsilon_2$  are independent standard normal random variables. In  
 939 this setting, it's clear that  $H_0 : Y \perp\!\!\!\perp \hat{Y} \mid X$  holds.

940 We repeatedly sample  $n = 500$  independent observations from this distribution over  $(X, Y, \hat{Y})$   
 941 and run **ExpertTest** for each  $L \in \{25, 50 \dots 250\}$ . We let  $K = 50$  and  $m(x, x') := \|x - x'\|_2^2$   
 942 be the  $\ell_2$  distance. We let the loss function  $F(\cdot)$  be the mean squared error of  $\hat{Y}$  with respect to  
 943  $Y$ . For each scenario we again choose a critical threshold of  $\alpha = .05$ , and report how frequently  
 944 **ExpertTest** incorrectly rejects the null hypothesis over 50 independent simulations in Figure 5.

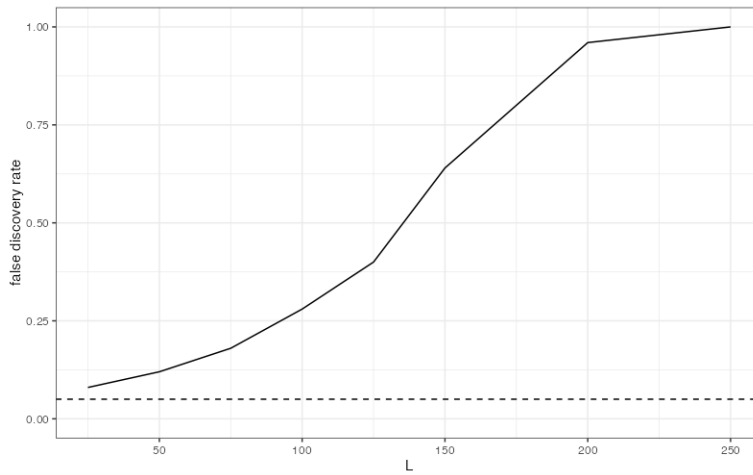

Figure 5: The type I error rate of **ExpertTest** as a function of  $L$ , with  $n = 500$  and a critical threshold of  $.05$ . The horizontal dashed line corresponds to the nominal false discovery rate of  $.05$

945 As we can see, the type I error increases sharply as a function of  $L$ , and **ExpertTest** incurs a false  
 946 discovery rate of 100% at the largest possible value of  $L = \frac{n}{2}$ ! This suggests that significant care  
 947 should be exercised when choosing the value of  $L$ , particularly in small samples, and responsible use  
 948 of **ExpertTest** will involve leveraging domain expertise to assess whether the pairs chosen are indeed  
 949 ‘similar’ enough to provide type I error control.

## 950 G Pseudocode for ExpertTest

951 In this section we provide pseudocode for **ExpertTest**. Inputs  $D_0, L, K, \alpha, F(\cdot), m(\cdot, \cdot)$  are as  
 952 defined in Section 3.

---

**ExpertTest**( $D_0, L, K, \alpha, F(\cdot), m(\cdot, \cdot)$ )

---

$X_0 \leftarrow \{x \mid (x, \cdot, \cdot) \in D_0\}$  ▷ initialize set of remaining observations  
 $P \leftarrow \emptyset$  ▷ initialize set of paired predictions

**for**  $\ell = 1 : L$  **do**  
 $(x_{2\ell-1}, x_{2\ell}) \leftarrow \underset{(x, x')}{\operatorname{argmin}} m(x, x')$  ▷ find closest remaining pair, breaking ties arbitrarily  
 $X_\ell \leftarrow X_{\ell-1} \setminus \{x_{2\ell-1}, x_{2\ell}\}$   
 $P \leftarrow P \cup \{(\hat{y}_{2\ell-1}, \hat{y}_{2\ell})\}$  ▷ save predictions associated with closest remaining pair  
**end for**

$f_0 \leftarrow F(D_0)$  ▷ calculate observed loss

**for**  $k = 1 : K$  **do**  
 $D_k \leftarrow \operatorname{swap}(D_0, P, \frac{1}{2})$  ▷ independently swap each  $(\hat{y}_{2\ell-1}, \hat{y}_{2\ell}) \in P$  with equal probability  
 $f_k \leftarrow F(D_k)$  ▷ calculate synthetic loss  
**end for**

$\tau \leftarrow \frac{1}{K} \sum_k \mathbb{1}[f_k \lesssim f_0]$  ▷ calculate quantile of observed loss, breaking ties at random

**if**  $\tau \leq \alpha$  **then** ▷ if  $\tau \leq \alpha$ ,  $H_0$  is rejected with p-value  $\alpha + \frac{1}{K+1}$   
 REJECT  
**end if**

---
